# Supplementary material
Source: publisher site journal article supplement (https://www.spandidos-publications.com/6921/downloadSupplementary)
Supplement: Supplementary file 1 [file downloadSupplementary]

Table SI. Western blotting antibodies.

| Antibody                   | Dilution | Cat. no. | Supplier                        |
|----------------------------|----------|----------|---------------------------------|
| GAPDH                      | 1:10,000 | ab181602 | Abcam                           |
| Goat anti-rabbit secondary | 1:20,000 | 7076S    | Cell Signaling Technology, Inc. |
| Goat anti-mouse secondary  | 1:20,000 | sc-2357  | Santa Cruz Biotechnology, Inc.  |
| Phosphorylated p42/44 MAPK | 1:2,000  | 4370S    | Cell Signaling Technology, Inc. |
| p42/44 MAPK                | 1:2,000  | 4696S    | Cell Signaling Technology, Inc. |
| E-cadherin                 | 1:1,000  | A20798   | ABclonal Biotech Co., Ltd.      |
| N-cadherin                 | 1:500    | A19083   | ABclonal Biotech Co., Ltd.      |
| Vimentin                   | 1:1,000  | A19607   | ABclonal Biotech Co., Ltd.      |
| MMP1                       | 1:1,000  | A22080   | ABclonal Biotech Co., Ltd.      |
| Fibronectin                | 1:500    | ab2413   | Abcam                           |

Table SII. Primer sequences.

| Target  | Forward, 5'→3'           | Reverse, 5'→3'           |
|---------|--------------------------|--------------------------|
| 18S     | GTAACCCGTTGAACCCATT      | CCATCCAATCGGTAGTAGCG     |
| CDH1    | CGAGAGCTACACGTTACGG      | GGGTGTCGAGGGAAAAATAGG    |
| CDH2    | TGGGAAATGGAACTTGATGGC    | AGTTGCTAAACTTCACTGAAAGGA |
| VIM     | TGTCCAAATCGATGTGGATGTTTC | TTGTACCATTCTTCTGCCTCCTG  |
| MMP1    | ATGCGAACAATCCCTTCTACC    | TTTCCTCAGAAAGAGCAGCATCG  |
| TGF-β1  | GGCCAGATCCTGTCCAAGC      | GTGGGTTTCCACCATTAGCAC    |
| SMAD3   | TGGACGCAGGTTCTCCAAAC     | CCGGCTCGCAGTAGGTAAC      |
| JUNB    | ACGACTCATACACAGCTACGG    | GCTCGGTTTCAGGAGTTTGTAGT  |
| SLC20A1 | TCCTTTGGTGGACTACCTATGG   | CGGATGGTTTCGCTCACTTTG    |

CDH, Cadherin; VIM, Vimentin; SLC20A1, solute carrier family 20 member 1.

Table SIII. Clinical characteristic baseline for databases.

| A, ICGC-ARGO baseline       |                        |                     |               |         |
|-----------------------------|------------------------|---------------------|---------------|---------|
| Clinical characteristic (%) | KRAS wild-type (n=351) | KRAS mutant (n=286) | Total (n=637) | P-value |
| Sex                         |                        |                     |               | 0.112   |
| Male                        | 200 (57.0)             | 144 (50.3)          | 344 (54.0)    |         |
| Female                      | 151 (43.0)             | 142 (49.7)          | 293 (46.0)    |         |
| Age, years                  |                        |                     |               | 0.750   |
| <50                         | 81 (23.1)              | 70 (24.5)           | 151 (23.7)    |         |
| ≥50                         | 270 (76.9)             | 216 (75.5)          | 486 (76.3)    |         |
| CMS                         |                        |                     |               | <0.001  |
| 1                           | 30 (8.5)               | 35 (12.2)           | 65 (10.2)     |         |
| 2                           | 157 (44.7)             | 70 (24.5)           | 227 (35.6)    |         |
| 3                           | 21 (6.0)               | 67 (23.4)           | 88 (13.8)     |         |
| 4                           | 105 (29.9)             | 64 (22.4)           | 169 (26.5)    |         |
| NA                          | 38 (10.8)              | 50 (17.5)           | 88 (13.8)     |         |
| pT stage                    |                        |                     |               | 0.223   |
| 1                           | 27 (7.7)               | 16 (5.6)            | 43 (6.8)      |         |
| 2                           | 66 (18.8)              | 72 (25.2)           | 138 (21.7)    |         |
| 3                           | 233 (66.4)             | 179 (62.6)          | 412 (64.7)    |         |
| 4                           | 25 (7.1)               | 19 (6.6)            | 44 (6.9)      |         |
| pN stage                    |                        |                     |               | 0.289   |
| N0                          | 224 (63.8)             | 194 (67.8)          | 418 (65.6)    |         |
| N+                          | 127 (36.2)             | 92 (32.2)           | 219 (34.4)    |         |
| Metachronous metastasis     |                        |                     |               | 0.040   |
| No                          | 320 (91.2)             | 246 (86.0)          | 566 (88.9)    |         |
| Yes                         | 31 (8.8)               | 40 (14.0)           | 71 (11.1)     |         |
| B, MSKCC                    |                        |                     |               |         |
| Clinical characteristic (%) | KRAS wild-type (n=213) | KRAS mutant (n=144) | Total (n=357) | P-value |
| Sex                         |                        |                     |               | 0.003   |
| Male                        | 137 (38.4)             | 70 (19.6)           | 207 (58.0)    |         |
| Female                      | 76 (21.3)              | 74 (20.7)           | 150 (42.0)    |         |
| Age, years                  |                        |                     |               | 0.060   |
| <50                         | 68 (19.0)              | 60 (16.8)           | 128 (35.9)    |         |
| ≥50                         | 145 (40.6)             | 84 (23.5)           | 229 (64.1)    |         |
| CMS                         |                        |                     |               | 0.001   |
| 1                           | 3 (0.8)                | 9 (2.5)             | 12 (3.4)      |         |
| 2                           | 20 (5.6)               | 5 (1.4)             | 25 (7.0)      |         |

|                        |           |           |           |       |
|------------------------|-----------|-----------|-----------|-------|
| 3                      | 10(2.8)   | 15(4.2)   | 25(7.0)   |       |
| 4                      | 24(6.7)   | 8(2.2)    | 32(9.0)   |       |
| NA                     | 156(43.7) | 107(30.0) | 263(73.7) |       |
| Tumorlocation          |           |           |           | 0.675 |
| Upper rectum           | 68(19.0)  | 43(12.0)  | 111(31.1) |       |
| Middle rectum          | 96(26.9)  | 61(17.1)  | 157(44.0) |       |
| Lower rectum           | 48(13.4)  | 38(10.6)  | 86(24.1)  |       |
| NA                     | 1(0.3)    | 2(0.6)    | 3(0.8)    |       |
| ypT stage              |           |           |           | 0.991 |
| 0-Tis                  | 42(11.8)  | 30(8.4)   | 72(20.2)  |       |
| 1                      | 12(3.4)   | 8(2.2)    | 20(5.6)   |       |
| 2                      | 50(14.0)  | 32(9.0)   | 82(23.0)  |       |
| 3                      | 42(11.8)  | 26(7.3)   | 68(19.0)  |       |
| 4                      | 4(1.1)    | 2(0.6)    | 6(1.7)    |       |
| NA                     | 63(17.6)  | 46(12.9)  | 109(30.5) |       |
| ypN stage              |           |           |           | 0.978 |
| N0                     | 109(30.5) | 72(20.2)  | 181(50.7) |       |
| N+                     | 27(7.6)   | 18(5.0)   | 45(12.6)  |       |
| NA                     | 77(21.6)  | 54(15.1)  | 213(59.7) |       |
| Metachronousmetastasis |           |           |           | 0.077 |
| No                     | 185(51.8) | 115(32.2) | 300(84.0) |       |
| Yes                    | 28(7.8)   | 29(8.1)   | 57(16.0)  |       |

### C, Sidra-LUMCAC-ICAM

| Clinicalcharacteristic (%) | KRASwild-type<br>(n=147) | KRASmutant<br>(n=77) | Total(n=224) | P-value |
|----------------------------|--------------------------|----------------------|--------------|---------|
| Sex                        |                          |                      |              | 0.972   |
| Male                       | 76(33.9)                 | 40(17.9)             | 116(51.8)    |         |
| Female                     | 71(31.7)                 | 37(16.5)             | 108(48.2)    |         |
| Age, years                 |                          |                      |              | 0.776   |
| <50                        | 10(4.5)                  | 4(1.8)               | 14(6.3)      |         |
| ≥50                        | 137(61.2)                | 73(32.6)             | 210(93.8)    |         |
| CMS                        |                          |                      |              | 0.838   |
| 1                          | 21(9.4)                  | 9(4.0)               | 30(13.4)     |         |
| 2                          | 37(16.5)                 | 17(7.6)              | 54(24.1)     |         |
| 3                          | 32(14.3)                 | 15(6.7)              | 47(21.0)     |         |
| 4                          | 27(12.1)                 | 16(7.1)              | 43(19.2)     |         |
| Mixed                      | 30(13.4)                 | 20(8.9)              | 50(22.2)     |         |
| Tumorlocation              |                          |                      |              | 0.079   |

|                        |           |          |           |        |
|------------------------|-----------|----------|-----------|--------|
| Righthemicolon         | 66(29.5)  | 35(15.6) | 101(45.1) |        |
| Transversecolon        | 6(2.7)    | 9(4.0)   | 15(6.7)   |        |
| Lefthemicolon          | 75(33.5)  | 33(14.7) | 108(48.2) |        |
| pT stage               |           |          |           | 0.292  |
| 1                      | 9(4.0)    | 4(1.8)   | 13(5.8)   |        |
| 2                      | 35(15.6)  | 11(4.9)  | 46(20.5)  |        |
| 3                      | 93(41.5)  | 58(25.9) | 151(67.4) |        |
| 4                      | 10(4.5)   | 4(1.8)   | 14(6.3)   |        |
| pN stage               |           |          |           | <0.001 |
| N0                     | 129(57.6) | 13(5.8)  | 142(63.4) |        |
| N+                     | 18(8.0)   | 64(28.6) | 82(36.6)  |        |
| Metachronousmetastasis |           |          |           | 0.091  |
| No                     | 129(57.9) | 61(27.2) | 190(84.8) |        |
| Yes                    | 18(8.0)   | 16(7.1)  | 34(15.2)  |        |

---

ICGC-ARGO, The International Cancer Genome Consortium Accelerating Research in Genomic Oncology; CMS, Consensus Molecular Subtypes; MSKCC, Memorial Sloan-Kettering Cancer Center; LUMC AC-ICAM, Leiden University Medical Center Atlas and Compass of Immune-Cancer-Microbiome interactions

Table SIV. Clinical characteristic baseline of databases.

| A, ICGC-ARGOKRAS-MUTchemotherapy     |                                 |                               |         |                                |                              |         |
|--------------------------------------|---------------------------------|-------------------------------|---------|--------------------------------|------------------------------|---------|
| Clinical characteristic (%)          | Before matching                 |                               |         | After matching                 |                              |         |
|                                      | Noadjuvant chemotherapy (n=171) | Adjuvant chemotherapy (n=115) | P-value | Noadjuvant chemotherapy (n=79) | Adjuvant chemotherapy (n=79) | P-value |
| Sex                                  |                                 |                               | 0.074   |                                |                              | 0.750   |
| Male                                 | 94 (55.0)                       | 50 (43.5)                     |         | 41 (51.9)                      | 44 (55.7)                    |         |
| Female                               | 77 (45.0)                       | 65 (56.5)                     |         | 38 (48.1)                      | 35 (44.3)                    |         |
| Age, years                           |                                 |                               | 0.001   |                                |                              | 0.001   |
| <50                                  | 30 (17.5)                       | 40 (34.8)                     |         | 9 (11.4)                       | 28 (35.4)                    |         |
| ≥50                                  | 141 (82.5)                      | 75 (65.2)                     |         | 70 (88.6)                      | 51 (64.6)                    |         |
| pT stage                             |                                 |                               | <0.001  |                                |                              | .387    |
| 1                                    | 15 (8.8)                        | 1 (0.9)                       |         | 2 (2.5)                        | 0 (0.0)                      |         |
| 2                                    | 58 (33.9)                       | 14 (12.2)                     |         | 9 (11.4)                       | 9 (11.4)                     |         |
| 3                                    | 90 (52.6)                       | 89 (77.4)                     |         | 62 (78.5)                      | 60 (75.9)                    |         |
| 4                                    | 8 (4.7)                         | 11 (9.6)                      |         | 6 (7.6)                        | 10 (12.7)                    |         |
| pN stage                             |                                 |                               | <0.001  |                                |                              | .868    |
| N0                                   | 143 (83.6)                      | 51 (44.3)                     |         | 51 (64.6)                      | 50 (63.3)                    |         |
| N+                                   | 28 (16.4)                       | 64 (55.7)                     |         | 28 (10.4)                      | 29 (12.5)                    |         |
| B, ICGC-ARGOKRAS-WT CRC chemotherapy |                                 |                               |         |                                |                              |         |
| Clinical characteristic (%)          | Before matching                 |                               |         | After matching                 |                              |         |
|                                      | Noadjuvant chemotherapy (n=226) | Adjuvant chemotherapy (n=175) | P-value | Noadjuvant chemotherapy (n=81) | Adjuvant chemotherapy (n=81) | P-value |
| Sex                                  |                                 |                               | >0.999  |                                |                              | 0.874   |
| Male                                 | 130 (57.5)                      | 101 (57.7)                    |         | 48 (59.3)                      | 46 (56.8)                    |         |
| Female                               | 96 (42.5)                       | 74 (42.3)                     |         | 33 (40.7)                      | 35 (43.2)                    |         |
| Age, years                           |                                 |                               | 0.009   |                                |                              | 0.167   |
| <50                                  | 41 (18.1)                       | 52 (29.7)                     |         | 12 (14.8)                      | 20 (24.7)                    |         |
| ≥50                                  | 185 (81.9)                      | 123 (70.3)                    |         | 69 (85.2)                      | 61 (75.3)                    |         |
| pT stage                             |                                 |                               | <0.001  |                                |                              | 0.637   |
| 1                                    | 24 (10.6)                       | 5 (2.9)                       |         | 3 (3.7)                        | 1 (1.2)                      |         |

| 2                            | 70 (31.0)             | 13 (7.4)            |         | 5 (6.2)               | 8 (9.9)             |         |
|------------------------------|-----------------------|---------------------|---------|-----------------------|---------------------|---------|
| 3                            | 123 (54.4)            | 140 (80.0)          |         | 64 (79.0)             | 63 (77.8)           |         |
| 4                            | 9 (4.0)               | 17 (9.7)            |         | 9 (11.1)              | 9 (11.1)            |         |
| pN stage                     |                       |                     | <0.001  |                       |                     | >0.999  |
| N0                           | 192 (85.0)            | 54(30.9)            |         | 51 (63.0)             | 51 (63.0)           |         |
| N+                           | 34(15.0)              | 121(69.1)           |         | 30(27.0)              | 30(27.0)            |         |
| C, MSKCCKRAS-MUTchemotherapy |                       |                     |         |                       |                     |         |
| Clinicalcharacteristic (%)   | Beforematching        |                     |         | Aftermatching         |                     |         |
|                              | Noadjuvantchemo(n=52) | Adjuvantchemo(n=24) | P-value | Noadjuvantchemo(n=24) | Adjuvantchemo(n=24) | P-value |
| Sex                          |                       |                     | 0.344   |                       |                     | >0.999  |
| Male                         | 20(26.3)              | 12(15.8)            |         | 12 (25.0)             | 12 (25.0)           |         |
| Female                       | 32(42.1)              | 12(15.8)            |         | 12 (25.0)             | 12 (25.0)           |         |
| Age, years                   |                       |                     | 0.715   |                       |                     | 0.562   |
| <50                          | 24(31.6)              | 10(13.2)            |         | 12(25.0)              | 10(20.8)            |         |
| ≥50                          | 28(36.8)              | 14(18.4)            |         | 12(25.0)              | 14(29.2)            |         |
| Tumorlocation                |                       |                     | 0.113   |                       |                     | 0.484   |
| Upper rectum                 | 22(28.9)              | 5(6.6)              |         | 8(16.7)               | 5(10.4)             |         |
| Middle rectum                | 18(23.7)              | 14(18.4)            |         | 10(20.8)              | 14(29.2)            |         |
| Lower rectum                 | 12(15.8)              | 5(6.6)              |         | 6(12.5)               | 5(10.4)             |         |
| ypT stage                    |                       |                     | 0.541   |                       |                     | >0.999  |
| 0-Tis                        | 16(21.1)              | 4(5.3)              |         | 4(8.3)                | 4(8.3)              |         |
| 1                            | 4(5.3)                | 4(5.3)              |         | 4(8.3)                | 4(8.3)              |         |
| 2                            | 17(22.4)              | 9(11.8)             |         | 9(18.8)               | 9(18.8)             |         |
| 3                            | 14(18.4)              | 7(9.2)              |         | 7(14.6)               | 7(14.6)             |         |
| 4                            | 1(1.3)                | 0 (0.0)             |         | 0 (0.0)               | 0 (0.0)             |         |
| ypN stage                    |                       |                     | 0.708   |                       |                     | 0.731   |
| N0                           | 41(53.9)              | 18(23.7)            |         | 19(39.6)              | 18(37.5)            |         |
| N+                           | 11(14.5)              | 6(7.9)              |         | 5(10.4)               | 6(12.5)             |         |
| D, MSKCCKRAS-WTchemotherapy  |                       |                     |         |                       |                     |         |
| Clinicalcharacteristic (%)   | Beforematching        |                     |         | Aftermatching         |                     |         |
|                              | Noadjuvantchemo(n=84) | Adjuvantchemo(n=32) | P-value | Noadjuvantchemo(n=32) | Adjuvantchemo(n=32) | P-value |
| Sex                          |                       |                     | 0.270   |                       |                     | 0.200   |

| Male                                        | 54(46.6)              | 17(14.7)            |         | 22(34.4)              | 17(26.6)            |         |
|---------------------------------------------|-----------------------|---------------------|---------|-----------------------|---------------------|---------|
| Female                                      | 30(25.9)              | 15(12.9)            |         | 10(15.6)              | 15(23.4)            |         |
| Age, years                                  |                       |                     | 0.121   |                       |                     | 0.777   |
| <50                                         | 34(29.3)              | 8(6.9)              |         | 9(14.1)               | 8(12.5)             |         |
| ≥50                                         | 50(43.1)              | 24(20.7)            |         | 23(35.9)              | 24(37.5)            |         |
| Tumorlocation                               |                       |                     | 0.855   |                       |                     | 0.855   |
| Upper rectum                                | 32(27.6)              | 14(12.1)            |         | 13(20.3)              | 14(21.9)            |         |
| Middle rectum                               | 38(32.8)              | 13(11.2)            |         | 16(25.0)              | 13(21.3)            |         |
| Lower rectum                                | 14(12.1)              | 5(4.3)              |         | 3(4.7)                | 5(7.8)              |         |
| ypT stage                                   |                       |                     | 0.512   |                       |                     | 0.750   |
| 0-Tis                                       | 23(19.8)              | 8(6.9)              |         | 8(12.5)               | 8(12.5)             |         |
| 1                                           | 6(5.2)                | 3(2.6)              |         | 3(4.7)                | 3(9.4)              |         |
| 2                                           | 28(24.1)              | 12(10.3)            |         | 13(20.34)             | 12(18.8)            |         |
| 3                                           | 26(22.4)              | 7(6.0)              |         | 8(12.5)               | 7(10.9)             |         |
| 4                                           | 1(0.9)                | 2(1.7)              |         | 0 (0.0)               | 2(3.1)              |         |
| ypN stage                                   |                       |                     | 0.120   |                       |                     | 0.708   |
| N0                                          | 65(56.0)              | 29(25.0)            |         | 27(42.2)              | 29(45.3)            |         |
| N+                                          | 19(16.4)              | 3(2.6)              |         | 5(7.8)                | 3(4.7)              |         |
| E, Sidra-LUMCAC-ICAMKRAS-MUTCRCchemotherapy |                       |                     |         |                       |                     |         |
| Clinicalcharacteristic (%)                  | Beforematching        |                     |         | Aftermatching         |                     |         |
|                                             | Noadjuvantchemo(n=60) | Adjuvantchemo(n=17) | P-value | Noadjuvantchemo(n=13) | Adjuvantchemo(n=13) | P-value |
| Sex                                         |                       |                     | 0.314   |                       |                     | 0.695   |
| Male                                        | 33(42.9)              | 7(9.1)              |         | 7(26.9)               | 6(23.1)             |         |
| Female                                      | 27(35.1)              | 10(13.0)            |         | 6(23.1)               | 7(26.9)             |         |
| Age, years                                  |                       |                     | 0.210   |                       |                     | >0.999  |
| <50                                         | 2(2.6)                | 2(2.6)              |         | 1(3.8)                | 1(3.8)              |         |
| ≥50                                         | 58(75.3)              | 15(19.5)            |         | 12(46.2)              | 12(46.2)            |         |
| Tumorlocation                               |                       |                     | 0.005   |                       |                     | 0.760   |
| Upper                                       | 24(31.2)              | 11(14.3)            |         | 8(30.8)               | 9(34.6)             |         |
| Middle                                      | 4(5.2)                | 5(6.5)              |         | 4(15.4)               | 3(11.5)             |         |
| Lower                                       | 32(41.6)              | 1(1.3)              |         | 1(3.8)                | 1(3.8)              |         |
| pT stage                                    |                       |                     | 0.888   |                       |                     | >0.999  |

|                                            |                        |                     |         |                       |                     |         |
|--------------------------------------------|------------------------|---------------------|---------|-----------------------|---------------------|---------|
| 1                                          | 3(3.9)                 | 1(1.3)              |         | 1(3.8)                | 1(3.8)              |         |
| 2                                          | 8(10.4)                | 3(3.9)              |         | 3(11.5)               | 3(11.5)             |         |
| 3                                          | 47(61.0)               | 11(14.3)            |         | 9(34.9)               | 9(34.9)             |         |
| 4                                          | 2(2.6)                 | 2(2.6)              |         | 0 (0.0)               | 0 (0.0)             |         |
| pN stage                                   |                        |                     | <0.001  |                       |                     | 0.411   |
| N0                                         | 4(5.2)                 | 9(11.7)             |         | 3(11.5)               | 6(23.1)             |         |
| N+                                         | 56(72.7)               | 8(10.4)             |         | 10(38.5)              | 7(26.9)             |         |
| F, Sidra-LUMCAC-ICAMKRAS-WTCRCchemotherapy |                        |                     |         |                       |                     |         |
| Clinicalcharacteristic (%)                 | Beforematching         |                     |         | Aftermatching         |                     |         |
|                                            | Noadjuvantchemo(n=111) | Adjuvantchemo(n=36) | P-value | Noadjuvantchemo(n=18) | Adjuvantchemo(n=18) | P-value |
| Sex                                        |                        |                     | 0.194   |                       |                     | >0.999  |
| Male                                       | 54(36.7)               | 22(15.0)            |         | 10(27.8)              | 10(27.8)            |         |
| Female                                     | 57(38.8)               | 14(9.5)             |         | 8(22.2)               | 8(22.2)             |         |
| Age, years                                 |                        |                     | 0.260   |                       |                     | >0.999  |
| <50                                        | 6(4.1)                 | 4(2.7)              |         | 1(2.8)                | 1(2.8)              |         |
| ≥50                                        | 105(71.4)              | 32(21.8)            |         | 17(47.2)              | 17(47.2)            |         |
| Tumorlocation                              |                        |                     | 0.585   |                       |                     | 0.855   |
| Righthemicolon                             | 51(34.7)               | 15(10.2)            |         | 8(22.2)               | 9(25.0)             |         |
| Transversecolon                            | 5(3.4)                 | 1(0.7)              |         | 0 (0.0)               | 0 (0.0)             |         |
| Lefthemicolon                              | 55(37.4)               | 20(13.6)            |         | 10(27.8)              | 9(25.0)             |         |
| pT stage                                   |                        |                     | 0.035   |                       |                     | 0.803   |
| 1                                          | 8(5.4)                 | 1(0.7)              |         | 1(2.8)                | 1(2.8)              |         |
| 2                                          | 30(20.4)               | 5(3.4)              |         | 4(11.1)               | 5(13.9)             |         |
| 3                                          | 67(45.6)               | 26(17.7)            |         | 12(33.3)              | 11(30.6)            |         |
| 4                                          | 6(4.1)                 | 4(2.7)              |         | 1(2.8)                | 1(2.8)              |         |
| pN stage                                   |                        |                     | <0.001  |                       |                     | >0.999  |
| N0                                         | 111(75.5)              | 18(12.2)            |         | 18(50.0)              | 18(50.0)            |         |
| N+                                         | 0 (0.0)                | 18(12.2)            |         | 0 (0.0)               | 0 (0.0)             |         |

MUT, KRAS-mutant; KRAS-WT, KRAS-wildtype; ICGC-ARGO, The International Cancer Genome Consortium Accelerating Research in Genomic Oncology; MSKCC, Memorial Sloan-Kettering Cancer Center; LUMC AC-ICAM, Leiden University Medical Center Atlas and Compass of Immune-Cancer-Microbiome interactions
